# Supplementary material
Source: Research Square preprint supplement (doi:10.21203/rs.3.rs-9560147/v1)
Supplement: Supplementary file 1 [file 652a501e09f63ee2b745d706.docx]

**Supplementary Methods**

**Detailed search terms**

***PubMed* search terms.** (agency OR AI OR android OR anthropomorphism OR anthropomorphized OR artificial agent OR artificial intelligence OR artificial social partners OR automatic driving OR avatar OR chatbot OR ChatGPT OR computer counterpart OR computer opponent OR computer partner OR HCI OR HRI OR human computer interaction OR human likeness OR human robot interaction OR humanoid OR large language model OR LLM OR lottery controlled by computer OR non-biological co-actor OR non-human agent OR robot OR robotic OR self-driving OR uncanny valley OR video game OR virtual agent OR virtual assistant OR social feedback game) AND (functional magnetic resonance imaging OR fMRI OR neuroimaging OR neural response OR bold response OR brain activation OR brain activity OR neural activation OR neural activity).Limits: English.

***Web of Science* search terms.** (agency OR AI OR android OR anthropomorphism OR anthropomorphized OR artificial agent OR artificial intelligence OR artificial social partners OR automatic driving OR avatar OR chatbot OR ChatGPT OR computer counterpart OR computer opponent OR computer partner OR HCI OR HRI OR human computer interaction OR human likeness OR human robot interaction OR humanoid OR large language model OR LLM OR lottery controlled by computer OR non-biological co-actor OR non-human agent OR robot OR robotic OR self-driving OR uncanny valley OR video game OR virtual agent OR virtual assistant OR social feedback game) AND (functional magnetic resonance imaging OR fMRI OR neuroimaging OR neural response OR bold response OR brain activation OR brain activity OR neural activation OR neural activity).Limits: English; 2001-to date; articles and letters.

**Detailed Subgroup Categorization Criteria**

We merged related terms to standardize the dataset. For example, "emotions," "emotional," were all unified under "emotion," "facial expressions" was consolidated into "face,". Cognitive-related terms such as "theory of mind," "theory mind," and "mentalizing" were grouped together, and "moral mind" was merged with "moral." We also consolidated "visual cortex" into "visual," and terms related to social behavior, like "socially," were combined into "social." This approach ensures consistency across terms related to similar concepts, reducing redundancy in the analysis.

***Social-cognitive category.*** Terms reflecting social cognition, interpersonal processing, and mentalizing processes were included. Specifically, this category comprised: social, social interaction, social cognition, theory of mind, moral, mental, belief, intention, understanding, inference, self-referential, partner, identity, agent, interpersonal.

***Valuation category***. Terms associated with reward processing, economic evaluation, valuation, and incentive-based decision-making were included. Specifically, this category comprised: reward, economic, value, preference, evaluation, outcome, decision making, expectation, reinforcement, money.

***Affective/interoceptive category***. Terms related to affective processing, emotional valence, and arousal were included. Specifically, this category comprised: emotion, emotional valence, emotional faces, affect, arousal, feeling, fear, fearful, anger, angry, threat, threatening, pleasant, unpleasant, aversive, emotion regulation, happy, sad.

***General processing category***. Terms reflecting domain-general cognitive or perceptual functions, including basic facial and object processing, were included. Specifically, this category comprised: experience; gesture; action observation; visual motion; perception; visual perception; direction; imitation; recognize; face; facial; thought; violation; reasoning; responsive; thinking.

**Supplementary Tables**

**STable 1. Checklist for Study Quality Assessment.**

|  | **Category** | **Quality Criterion** | **Description** |
| --- | --- | --- | --- |
| Q1 | Participants | Sample Size | The study included at least 20 participants per group or condition (N ≥ 20) to ensure sufficient statistical power. |
| Q2 | Participants | Diagnostic Criteria | Inclusion/exclusion criteria were clearly stated; participants were free of neurological or psychiatric disorders (or diagnosed using standard criteria if the study targeted a clinical population). |
| Q3 | Design | Experimental Control | An appropriate control condition or baseline task was included to isolate task-specific neural activity (e.g., matching physical properties of stimuli between Human and Artificial agent conditions). |
| Q4 | Acquisition | Imaging Details | MRI field strength (e.g., 1.5T, 3T) and scanner model were clearly reported. |
| Q5 | Preprocessing | Motion Correction | Head motion correction was explicitly performed, or participants with excessive motion were excluded. |
| Q6 | Preprocessing | Normalization | Spatial normalization to a standard stereotactic space (MNI or Talairach) was explicitly reported. |
| Q7 | Statistics | Correction for Multiple Comparisons | Correction for multiple comparisons was applied (e.g., FWE, FDR) or appropriate cluster-level correction was used. Studies using uncorrected thresholds without cluster-size constraints received a score of 0. |
| Q8 | Statistics | Whole-Brain Analysis | Results were based on whole-brain analysis rather than restricted to Region of Interest (ROI) analysis to avoid selection bias. |
| Q9 | Reporting | Contrast Specificity | Specific contrasts (e.g., Human > Non-Human) and their directionality were clearly described, allowing for the isolation of the effect of interest. |
| Q10 | Reporting | Coordinate Reporting | A full list of peak coordinates (x, y, z) for the relevant contrasts was provided in the main text or supplementary materials. |

**STable 2. Quality check results of included studies.**

| **Author (Year)** | **Q1** | **Q2** | **Q3** | **Q4** | **Q5** | **Q6** | **Q7** | **Q8** | **Q9** | **Q10** | **Total** |
| --- | --- | --- | --- | --- | --- | --- | --- | --- | --- | --- | --- |
| Abel et al. (2022) | 1 | 1 | 1 | 1 | 1 | 1 | 1 | 1 | 1 | 1 | 10 |
| Abu-Akel et al. (2020) | 1 | 1 | 1 | 1 | 1 | 1 | 1 | 1 | 1 | 1 | 10 |
| Anders et al. (2015) | 0 | 1 | 1 | 1 | 1 | 1 | 1 | 1 | 1 | 1 | 9 |
| Brüne et al. (2013) | 1 | 1 | 1 | 1 | 1 | 1 | 1 | 1 | 1 | 1 | 10 |
| Carter et al. (2011) | 0 | 1 | 1 | 1 | 1 | 1 | 1 | 1 | 1 | 1 | 8 |
| Caspar et al. (2022) | 1 | 1 | 1 | 1 | 1 | 1 | 1 | 1 | 1 | 1 | 9 |
| Cesare et al. (2016) | 0 | 1 | 1 | 1 | 1 | 1 | 1 | 1 | 1 | 1 | 9 |
| Chaminade et al. (2007) | 0 | 1 | 1 | 1 | 1 | 1 | 1 | 1 | 1 | 1 | 9 |
| Chaminade et al. (2012) | 0 | 1 | 1 | 1 | 1 | 1 | 1 | 1 | 1 | 1 | 9 |
| Coricelli et al. (2009) | 1 | 1 | 1 | 1 | 1 | 1 | 1 | 1 | 1 | 1 | 10 |
| Cross et al. (2012) | 1 | 1 | 1 | 1 | 1 | 1 | 1 | 1 | 1 | 1 | 10 |
| Cross et al. (2019) | 1 | 1 | 1 | 1 | 1 | 1 | 1 | 1 | 1 | 1 | 10 |
| Delgado et al. (2008) | 0 | 1 | 1 | 1 | 1 | 1 | 1 | 1 | 1 | 1 | 8 |
| Desmet et al. (2014) | 0 | 1 | 1 | 1 | 1 | 1 | 1 | 1 | 1 | 1 | 9 |
| Dieter et al. (2015) | 0 | 1 | 1 | 1 | 0 | 1 | 1 | 1 | 1 | 1 | 8 |
| Fukui et al. (2006) | 0 | 1 | 1 | 1 | 1 | 1 | 1 | 1 | 1 | 1 | 9 |
| Gobbini et al. (2011) | 0 | 1 | 1 | 1 | 1 | 1 | 1 | 1 | 1 | 1 | 9 |
| Hogenhuis et al. (2022) | 1 | 1 | 1 | 1 | 1 | 1 | 1 | 1 | 1 | 1 | 10 |
| Hu et al. (2018) | 1 | 1 | 1 | 1 | 1 | 1 | 1 | 1 | 1 | 1 | 10 |
| Ikeda et al. (2017) | 0 | 1 | 1 | 1 | 1 | 1 | 1 | 1 | 1 | 1 | 9 |
| Jiménez et al. (2022) | 1 | 1 | 1 | 1 | 1 | 1 | 1 | 1 | 1 | 1 | 10 |
| Kegel et al. (2020) | 1 | 1 | 1 | 1 | 1 | 1 | 1 | 1 | 1 | 1 | 10 |
| Kircher et al. (2009) | 0 | 1 | 1 | 1 | 1 | 1 | 1 | 1 | 1 | 1 | 9 |
| Koban et al. (2014) | 0 | 1 | 1 | 1 | 1 | 1 | 1 | 1 | 1 | 1 | 8 |
| Krach et al. (2008) | 1 | 1 | 1 | 1 | 1 | 1 | 1 | 1 | 1 | 1 | 10 |
| Krach et al. (2009) | 1 | 1 | 1 | 1 | 1 | 1 | 1 | 1 | 1 | 1 | 10 |
| Kätsyri et al. (2013) | 0 | 1 | 1 | 1 | 1 | 1 | 1 | 1 | 1 | 1 | 9 |
| Kätsyri et al. (2020) | 1 | 1 | 1 | 1 | 1 | 1 | 1 | 1 | 1 | 1 | 10 |
| Lee et al. (2014) | 1 | 1 | 1 | 1 | 1 | 1 | 1 | 1 | 1 | 1 | 9 |
| Liang et al. (2021) | 1 | 1 | 1 | 1 | 1 | 1 | 1 | 1 | 1 | 1 | 10 |
| McDonald et al. (2020) | 1 | 1 | 1 | 1 | 1 | 1 | 1 | 1 | 1 | 1 | 10 |
| Miura et al. (2010) | 1 | 1 | 1 | 1 | 1 | 1 | 1 | 1 | 1 | 1 | 10 |
| Moser et al. (2007) | 0 | 1 | 1 | 1 | 1 | 1 | 1 | 0 | 1 | 1 | 8 |
| Pfeiffer et al. (2014) | 1 | 1 | 1 | 1 | 1 | 1 | 1 | 1 | 1 | 1 | 9 |
| Rauchbauer et al. (2019) | 1 | 1 | 1 | 1 | 1 | 1 | 1 | 1 | 1 | 1 | 10 |
| Riedl et al. (2014) | 0 | 1 | 1 | 1 | 1 | 1 | 1 | 1 | 1 | 1 | 9 |
| Rosenthal-von der Pütten et al. (2019) | 1 | 1 | 1 | 1 | 1 | 1 | 1 | 1 | 1 | 1 | 10 |
| Sakaiya et al. (2013) | 1 | 1 | 1 | 1 | 1 | 1 | 1 | 1 | 1 | 1 | 10 |
| Saygin et al. (2012) | 0 | 1 | 1 | 1 | 1 | 1 | 1 | 1 | 1 | 1 | 9 |
| Schindler et al. (2019) | 1 | 1 | 1 | 1 | 1 | 1 | 1 | 1 | 1 | 1 | 10 |
| Shao et al. (2016) | 1 | 1 | 1 | 1 | 1 | 1 | 1 | 1 | 1 | 1 | 10 |
| Sun et al. (2015) | 1 | 1 | 1 | 1 | 1 | 1 | 1 | 1 | 1 | 1 | 10 |
| Takahashi et al. (2015) | 0 | 1 | 1 | 1 | 1 | 1 | 1 | 1 | 1 | 1 | 9 |
| Tanaka et al. (2025) | 1 | 1 | 1 | 1 | 1 | 1 | 1 | 1 | 1 | 1 | 10 |
| van den Bos et al. (2007) | 0 | 1 | 1 | 1 | 1 | 1 | 1 | 1 | 1 | 1 | 9 |
| Wang et al. (2015) | 1 | 1 | 1 | 1 | 1 | 1 | 1 | 1 | 1 | 1 | 10 |
| Wen et al. (2015) | 1 | 1 | 1 | 1 | 1 | 1 | 1 | 1 | 1 | 1 | 10 |
| Wu et al. (2018) | 1 | 1 | 1 | 1 | 1 | 1 | 1 | 1 | 1 | 1 | 10 |
| Xue et al. (2013) | 0 | 1 | 1 | 1 | 1 | 1 | 1 | 1 | 1 | 1 | 9 |
| Zhang et al. (2016) | 1 | 1 | 1 | 1 | 1 | 1 | 1 | 1 | 1 | 1 | 10 |
| Özdem et al. (2017) | 1 | 1 | 1 | 1 | 1 | 1 | 1 | 1 | 1 | 1 | 10 |

**Note**: For all categories, 1 indicates Present, and 0 indicates Absent. Q1: Sample Size; Q2: Diagnostic Criteria; Q3: Experimental Control; Q4: Imaging Details; Q5: Motion Correction; Q6: Normalization; Q7: Correction for Multiple Comparisons; Q8: Whole-Brain Analysis; Q9: Contrast Specificity; Q10: Coordinate Reporting.

**STable 3. Characteristics of included studies and coding classification for macro- and micro-domain analyses.**

|  | **C1** | **C2** | **C3** | **C4** | **C5** | **C6** | **C7** | **C8** | **C9** | **C10** | **C11** | **C12** | **C13** | **C14** | **C15** | **Macro-domain** |
| --- | --- | --- | --- | --- | --- | --- | --- | --- | --- | --- | --- | --- | --- | --- | --- | --- |
| Abel et al. (2022) | 0 | 1 | 0 | 0 | 0 | 0 | 0 | 0 | 0 | 0 | 0 | 0 | 0 | 0 | 1 | Social Perception |
| Abu-Akel et al. (2020) | 0 | 0 | 0 | 0 | 0 | 1 | 0 | 1 | 0 | 0 | 0 | 0 | 0 | 1 | 0 | Social Interaction |
| Anders et al. (2015) | 0 | 0 | 0 | 0 | 0 | 0 | 0 | 1 | 0 | 0 | 0 | 0 | 0 | 0 | 0 | Social Perception |
| Brüne et al. (2013) | 0 | 0 | 0 | 0 | 0 | 0 | 1 | 1 | 0 | 1 | 1 | 0 | 0 | 0 | 0 | Social Interaction |
| Carter et al. (2011) | 1 | 1 | 0 | 0 | 0 | 0 | 0 | 1 | 0 | 0 | 0 | 0 | 0 | 0 | 1 | Social Perception |
| Caspar et al. (2022) | 0 | 1 | 0 | 0 | 0 | 0 | 0 | 0 | 1 | 0 | 1 | 0 | 0 | 0 | 0 | Social Interaction |
| Cesare et al. (2016) | 0 | 0 | 0 | 0 | 0 | 0 | 0 | 0 | 0 | 0 | 0 | 0 | 0 | 0 | 0 | Social Perception |
| Chaminade et al. (2007) | 1 | 1 | 0 | 0 | 0 | 0 | 0 | 0 | 0 | 0 | 0 | 0 | 0 | 0 | 1 | Social Perception |
| Chaminade et al. (2012) | 1 | 1 | 1 | 0 | 0 | 1 | 0 | 1 | 0 | 0 | 0 | 0 | 0 | 0 | 1 | Social Interaction |
| Coricelli et al. (2009) | 0 | 0 | 0 | 0 | 0 | 1 | 0 | 1 | 0 | 0 | 0 | 0 | 0 | 0 | 0 | Social Interaction |
| Cross et al. (2012) | 1 | 1 | 0 | 0 | 0 | 0 | 0 | 0 | 0 | 0 | 0 | 0 | 0 | 0 | 0 | Social Perception |
| Cross et al. (2019) | 1 | 1 | 1 | 0 | 0 | 0 | 0 | 0 | 0 | 0 | 0 | 0 | 0 | 0 | 1 | Social Perception |
| Delgado et al. (2008) | 0 | 0 | 0 | 0 | 0 | 1 | 0 | 1 | 0 | 0 | 0 | 0 | 0 | 1 | 0 | Social Interaction |
| Desmet et al. (2014) | 0 | 0 | 0 | 0 | 0 | 0 | 0 | 0 | 0 | 0 | 0 | 0 | 0 | 0 | 1 | Social Perception |
| Dieter et al. (2015) | 0 | 0 | 0 | 0 | 0 | 0 | 0 | 0 | 0 | 0 | 0 | 0 | 0 | 0 | 1 | Social Perception |
| Fukui et al. (2006) | 0 | 0 | 0 | 0 | 1 | 1 | 1 | 1 | 0 | 0 | 0 | 0 | 0 | 1 | 0 | Social Interaction |
| Gobbini et al. (2011) | 1 | 0 | 1 | 0 | 0 | 0 | 0 | 0 | 0 | 0 | 0 | 0 | 0 | 0 | 1 | Social Perception |
| Hogenhuis et al. (2022) | 1 | 0 | 0 | 0 | 0 | 0 | 0 | 1 | 0 | 0 | 0 | 0 | 0 | 0 | 1 | Social Interaction |
| Hu et al. (2018) | 0 | 0 | 0 | 0 | 0 | 0 | 1 | 1 | 0 | 1 | 1 | 0 | 0 | 0 | 0 | Social Interaction |
| Ikeda et al. (2017) | 1 | 1 | 1 | 1 | 0 | 0 | 0 | 0 | 0 | 0 | 0 | 0 | 0 | 0 | 1 | Social Perception |
| Jiménez et al. (2022) | 0 | 0 | 0 | 0 | 1 | 0 | 1 | 1 | 0 | 1 | 0 | 0 | 0 | 1 | 0 | Social Interaction |
| Kegel et al. (2020) | 1 | 0 | 1 | 0 | 0 | 0 | 0 | 0 | 0 | 0 | 0 | 0 | 0 | 0 | 1 | Social Perception |
| Kircher et al. (2009) | 0 | 0 | 0 | 0 | 1 | 1 | 0 | 1 | 0 | 0 | 0 | 0 | 0 | 1 | 0 | Social Interaction |
| Koban et al. (2014) | 0 | 0 | 0 | 0 | 1 | 1 | 1 | 1 | 0 | 0 | 0 | 0 | 0 | 1 | 0 | Social Interaction |
| Krach et al. (2008) | 1 | 1 | 0 | 0 | 1 | 1 | 0 | 1 | 0 | 0 | 0 | 0 | 0 | 1 | 1 | Social Interaction |
| Krach et al. (2009) | 0 | 0 | 0 | 0 | 1 | 1 | 0 | 1 | 0 | 0 | 0 | 0 | 0 | 1 | 0 | Social Interaction |
| Kätsyri et al. (2013) | 0 | 0 | 0 | 0 | 0 | 1 | 0 | 1 | 0 | 0 | 0 | 0 | 0 | 0 | 0 | Social Interaction |
| Kätsyri et al. (2020) | 1 | 0 | 1 | 1 | 0 | 0 | 0 | 0 | 0 | 0 | 0 | 0 | 0 | 0 | 0 | Social Perception |
| Lee et al. (2014) | 0 | 0 | 0 | 0 | 1 | 0 | 1 | 1 | 1 | 0 | 0 | 0 | 0 | 1 | 0 | Social Interaction |
| Liang et al. (2021) | 0 | 0 | 0 | 0 | 0 | 0 | 0 | 0 | 0 | 0 | 0 | 0 | 0 | 0 | 1 | Social Perception |
| McDonald et al. (2020) | 0 | 0 | 0 | 0 | 0 | 1 | 0 | 1 | 0 | 0 | 0 | 0 | 0 | 1 | 0 | Social Interaction |
| Miura et al. (2010) | 1 | 1 | 0 | 0 | 0 | 0 | 0 | 0 | 0 | 0 | 0 | 0 | 0 | 0 | 1 | Social Perception |
| Moser et al. (2007) | 1 | 0 | 1 | 1 | 0 | 0 | 0 | 0 | 0 | 0 | 0 | 0 | 0 | 0 | 1 | Social Perception |
| Pfeiffer et al. (2014) | 1 | 0 | 0 | 0 | 0 | 0 | 0 | 1 | 0 | 0 | 0 | 0 | 0 | 0 | 1 | Social Interaction |
| Rauchbauer et al. (2019) | 1 | 0 | 0 | 0 | 1 | 0 | 0 | 1 | 0 | 0 | 0 | 0 | 0 | 0 | 1 | Social Interaction |
| Riedl et al. (2014) | 1 | 0 | 0 | 0 | 1 | 0 | 1 | 1 | 0 | 0 | 0 | 1 | 0 | 1 | 1 | Social Interaction |
| Rosenthal-von der Pütten et al. (2019) | 1 | 1 | 0 | 0 | 0 | 0 | 0 | 1 | 0 | 0 | 0 | 0 | 0 | 0 | 1 | Social Perception |
| Sakaiya et al. (2013) | 0 | 0 | 0 | 0 | 1 | 1 | 1 | 1 | 0 | 0 | 0 | 0 | 0 | 1 | 0 | Social Interaction |
| Saygin et al. (2012) | 1 | 1 | 0 | 0 | 0 | 0 | 0 | 0 | 0 | 0 | 0 | 0 | 0 | 0 | 1 | Social Perception |
| Schindler et al. (2019) | 0 | 0 | 0 | 0 | 0 | 0 | 0 | 1 | 0 | 0 | 0 | 0 | 0 | 0 | 0 | Social Interaction |
| Shao et al. (2016) | 0 | 0 | 0 | 0 | 0 | 0 | 0 | 1 | 0 | 0 | 0 | 0 | 0 | 1 | 0 | Social Interaction |
| Sun et al. (2015) | 0 | 0 | 0 | 0 | 1 | 1 | 1 | 1 | 0 | 0 | 0 | 0 | 1 | 1 | 0 | Social Interaction |
| Takahashi et al. (2015) | 0 | 0 | 0 | 0 | 0 | 1 | 1 | 1 | 0 | 0 | 0 | 0 | 0 | 0 | 0 | Social Interaction |
| Tanaka et al. (2025) | 1 | 0 | 1 | 1 | 0 | 0 | 0 | 1 | 0 | 0 | 0 | 0 | 0 | 1 | 1 | Social Interaction |
| van den Bos et al. (2007) | 0 | 0 | 0 | 0 | 0 | 0 | 0 | 0 | 0 | 0 | 0 | 1 | 1 | 0 | 0 | Social Interaction |
| Wang wt al. (2015) | 1 | 1 | 0 | 0 | 0 | 0 | 0 | 1 | 0 | 0 | 0 | 0 | 0 | 0 | 1 | Social Perception |
| Wen et al. (2015) | 0 | 0 | 0 | 0 | 1 | 0 | 0 | 1 | 0 | 0 | 0 | 0 | 0 | 0 | 0 | Social Interaction |
| Wu et al. (2018) | 0 | 0 | 0 | 0 | 0 | 0 | 1 | 1 | 0 | 0 | 0 | 1 | 1 | 1 | 0 | Social Interaction |
| Xue et al. (2013) | 0 | 0 | 0 | 0 | 0 | 0 | 0 | 1 | 1 | 0 | 0 | 0 | 0 | 1 | 0 | Social Interaction |
| Zhang et al. (2016) | 0 | 0 | 0 | 0 | 0 | 0 | 1 | 1 | 0 | 0 | 0 | 0 | 1 | 0 | 0 | Social Interaction |
| Özdem et al. (2017) | 1 | 0 | 0 | 0 | 0 | 0 | 0 | 0 | 0 | 0 | 0 | 0 | 0 | 0 | 1 | Social Perception |

**Note**: For all categories, 1 indicates Present, and 0 indicates Absent. C1: Facial appearance; C2: Body part; C3: Emotional/expression information; C4: Evaluation of agent's emotions; C5: Cooperation; C6: Competition; C7: Monetary exchange; C8: Mentalization inferences; C9: Agent acts on one's behalf; C10: Rewarding the agent; C11: Punishing the agent; C12: Rewarded by the agent; C13: Punished by the agent; C14: Risky decision-making; C15: Anthropomorphic Embodiment.

**STable 4. Descriptive Statistics for Micro-Subdomain Analyses.**

| **Domain** | | **No. of Experiments** | **No. of Foci** | **No. of Subjects** |
| --- | --- | --- | --- | --- |
| ***D1. Anthropomorphic Embodiment*** | |  |  |  |
|  | Present | 21 | 294 | 480 |
|  | Absent | 25 | 152 | 652 |
| ***D2. Facial Appearance*** | |  |  |  |
|  | Present | 18 | 272 | 400 |
|  | Absent | 28 | 174 | 732 |
| ***D3. Mentalization*** | |  |  |  |
|  | Present | 15 | 152 | 322 |
|  | Absent | 31 | 294 | 810 |
| ***D4. Interaction Goal*** | |  |  |  |
|  | Present | 17 | 114 | 407 |
|  | Absent | 29 | 332 | 725 |
| ***D5. Risky Decision-Making*** | |  |  |  |
|  | Present | 16 | 80 | 453 |
|  | Absent | 30 | 366 | 679 |

**STable 5. Inter-domain correlation matrix.**

|  | D1 | D2 | D3 | D4 | D5 |
| --- | --- | --- | --- | --- | --- |
| D1 | 1.000 |  |  |  |  |
| D2 | 0.763 (88%) | 1.000 |  |  |  |
| D3 | -0.403 (29%) | -0.299 (33%) | 1.000 |  |  |
| D4 | -0.372 (33%) | -0.315 (37%) | 0.569 (73%) | 1.000 |  |
| D5 | -0.390 (33%) | -0.338 (37%) | 0.522 (69%) | 0.574 (80%) | 1.000 |

**STable 6. Lateralization analyses for main results and macro-domains.**

|  | | Total | VN | SMN | DAN | VAN | LN | FPN | DMN | VST | AMY |
| --- | --- | --- | --- | --- | --- | --- | --- | --- | --- | --- | --- |
| ***All included*** | | |  |  |  |  |  |  |  |  |  |
|  | L | 900 | 0 | 0 | 0 | 0 | 73 | 0 | 619 | 13 | 0 |
|  | R | 3913 | 190 | 38 | 323 | 267 | 201 | 128 | 1749 | 265 | 248 |
|  | LI | -0.63 | -1 | -1 | -1 | -1 | -0.47 | -1 | -0.48 | -0.91 | -1 |
| ***Social perception*** | | |  |  |  |  |  |  |  |  |  |
|  | L | 65 | 42 | 0 | 23 | 0 | 0 | 0 | 0 | 0 | 0 |
|  | R | 120 | 87 | 0 | 33 | 0 | 0 | 0 | 0 | 0 | 0 |
|  | LI | -0.30 | -0.35 | - | -0.18 | - | - | - | - | - | - |
| ***Social interaction*** | | |  |  |  |  |  |  |  |  |  |
|  | L | 307 | 23 | 0 | 2 | 9 | 29 | 6 | 156 | 7 | 0 |
|  | R | 507 | 0 | 0 | 4 | 0 | 8 | 2 | 350 | 36 | 0 |
|  | LI | -0.25 | - | - | - | - | - | - | -0.38 | - | - |

**Note:** L = cluster size in left hemisphere in mm; R = cluster size in right hemisphere in mm; LI = (L-R)/(L+R).

**STable 7. Peak coordinates for micro-subgroup analysis: Anthropomorphic Embodiment sub-domain.**

| **Regions** | **L/R** | **BA** | **MNI Coordinates** | | | **ALE** | ***k*** |
| --- | --- | --- | --- | --- | --- | --- | --- |
| **x** | **y** | **z** |
| ***Present*** |  |  |  |  |  |  |  |
| Superior Temporal Gyrus | R | 22 | 54 | -66 | 8 | 0.031 | 94 |
| Middle Occipital Gyrus | L | 19 | -48 | -70 | 6 | 0.018 | 56 |
| Fusiform Gyrus | R | 37 | 42 | -44 | -18 | 0.017 | 22 |
| Angular Gyrus | L | 39 | -40 | -64 | 24 | 0.017 | 28 |
| Middle Temporal Gyrus | R | 21 | 56 | 4 | -20 | 0.016 | 35 |
| Middle Temporal Gyrus | R | 21 | 48 | -54 | 14 | 0.016 | 27 |
| Amygdala | R |  | 24 | -2 | -20 | 0.015 | 45 |
| Cerebellum | L |  | -12 | -76 | -14 | 0.015 | 28 |
| Superior Parietal Lobule | R | 7 | 26 | -54 | 66 | 0.015 | 29 |
| ***Absent*** |  |  |  |  |  |  |  |
| Angular Gyrus | R | 39 | 54 | -62 | 28 | 0.021 | 82 |
| Superior Frontal Gyrus (Medial) | R | 10 | 10 | 52 | 12 | 0.018 | 107 |
| Medial Orbital Frontal Gyrus | R | 11 | 4 | 40 | -6 | 0.017 | 79 |
| Inferior Frontal Gyrus (Orbital) | R | 47 | 38 | 26 | -16 | 0.017 | 63 |
| Superior Frontal Gyrus (Medial) | R | 10 | 6 | 60 | 32 | 0.016 | 32 |
| Thalamus | R |  | 14 | -28 | -2 | 0.015 | 36 |
| Thalamus | R |  | 6 | -22 | -2 | 0.015 | 34 |
| Superior Frontal Gyrus (Medial) | R | 10 | 6 | 62 | 2 | 0.015 | 34 |
| Thalamus | L |  | -8 | -20 | -10 | 0.015 | 32 |
| Lingual Gyrus | L | 18 | -24 | -94 | -20 | 0.015 | 22 |
| Gyrus Rectus / Medial OFC | R | 11 | 6 | 4 | -20 | 0.015 | 21 |
| Superior Temporal Gyrus | L | 39 | -50 | -58 | 20 | 0.014 | 47 |
| Superior Frontal Gyrus (Medial) | R | 8 | 8 | 38 | 50 | 0.014 | 40 |
| Superior Frontal Gyrus (Medial) | L | 10 | -4 | 60 | 12 | 0.014 | 27 |
| Supplementary Motor Area | L | 6 | -4 | 10 | 56 | 0.013 | 20 |

**STable 8. Peak coordinates for micro-subgroup analysis: Facial appearance sub-domain.**

| **Regions** | **L/R** | **BA** | **MNI Coordinates** | | | **ALE** | **k** |
| --- | --- | --- | --- | --- | --- | --- | --- |
| **x** | **y** | **z** |
| ***Present*** |  |  |  |  |  |  |  |
| Angular Gyrus | L | 39 | -40 | -64 | 24 | 0.017 | 34 |
| Middle Temporal Gyrus | R | 21 | 56 | 4 | -20 | 0.016 | 45 |
| Middle Temporal Gyrus | R | 21 | 48 | -54 | 14 | 0.016 | 32 |
| Amygdala | R |  | 24 | -2 | -20 | 0.015 | 58 |
| Cerebellum | L |  | -12 | -76 | -14 | 0.015 | 30 |
| Superior Parietal Lobule | R | 7 | 26 | -54 | 66 | 0.015 | 30 |
| ***Absent*** |  |  |  |  |  |  |  |
| Angular Gyrus | R | 39 | 54 | -62 | 28 | 0.021 | 75 |
| Superior Frontal Gyrus (Medial) | R | 10 | 10 | 52 | 12 | 0.018 | 83 |
| Inferior Frontal Gyrus (Orbital) | R | 47 | 38 | 26 | -16 | 0.018 | 69 |
| Medial Orbital Frontal Gyrus | R | 11 | 4 | 40 | -6 | 0.017 | 71 |
| Superior Frontal Gyrus (Medial) | R | 10 | 6 | 60 | 32 | 0.016 | 26 |
| Superior Frontal Gyrus (Medial) | R | 10 | 6 | 62 | 2 | 0.015 | 31 |
| Thalamus | R |  | 6 | -22 | -2 | 0.015 | 27 |
| Thalamus | R |  | 14 | -28 | -2 | 0.015 | 25 |
| Thalamus | L |  | -8 | -20 | -10 | 0.015 | 26 |
| Gyrus Rectus | R | 11 | 6 | 4 | -20 | 0.015 | 21 |
| Middle Temporal Gyrus | L | 39 | -50 | -58 | 20 | 0.014 | 33 |
| Superior Frontal Gyrus (Medial) | R | 8 | 8 | 38 | 50 | 0.014 | 29 |
| Superior Frontal Gyrus (Medial) | L | 10 | -4 | 60 | 12 | 0.014 | 20 |

**STable 9. Peak coordinates for micro-subgroup analysis: Mentalization inferences sub-domain.**

| **Regions** | **L/R** | **BA** | **MNI Coordinates** | | | **ALE** | ***k*** |
| --- | --- | --- | --- | --- | --- | --- | --- |
| **x** | **y** | **z** |
| ***Present*** |  |  |  |  |  |  |  |
| Medial Orbital Frontal Gyrus | L | 11 | -6 | 42 | -10 | 0.026 | 143 |
| Angular Gyrus | R | 39 | 56 | -56 | 26 | 0.023 | 220 |
| Inferior Frontal Gyrus (Orbital) | R | 47 | 38 | 26 | -16 | 0.018 | 73 |
| Thalamus | R |  | 14 | -28 | 0 | 0.017 | 32 |
| Superior Frontal Gyrus (Medial) | R | 9 | 4 | 40 | 44 | 0.016 | 51 |
| Mid-Cingulate Gyrus | L | 24 | -12 | -44 | 36 | 0.016 | 40 |
| Caudate | R |  | 8 | 10 | -4 | 0.016 | 28 |
| Thalamus | L |  | -8 | -20 | -10 | 0.016 | 24 |

**STable 10. Peak coordinates for micro-subgroup analysis: Interaction goal sub-domain.**

| **Regions** | **L/R** | **BA** | **MNI Coordinates** | | | **ALE** | ***k*** |
| --- | --- | --- | --- | --- | --- | --- | --- |
| **x** | **y** | **z** |
| ***Present*** |  |  |  |  |  |  |  |
| Angular Gyrus | R | 39 | 56 | -56 | 26 | 0.022 | 216 |
| Medial Orbital Frontal Gyrus | R | 11 | 6 | 40 | -6 | 0.016 | 46 |
| Superior Frontal Gyrus (Medial) | R | 9 | 6 | 60 | 32 | 0.016 | 43 |
| Thalamus | R |  | 6 | -22 | -2 | 0.015 | 88 |
| Thalamus |  |  | -8 | -20 | -10 | 0.015 | 43 |
| Superior Frontal Gyrus (Medial) | R | 10 | 6 | 62 | 2 | 0.015 | 43 |
| Gyrus Rectus | R | 11 | 6 | 4 | -20 | 0.015 | 30 |
| Lingual Gyrus | L | 18 | -24 | -94 | -20 | 0.015 | 26 |
| Inferior Occipital Gyrus | L | 19 | -38 | -84 | -20 | 0.014 | 22 |
| Medial Orbital Frontal Gyrus | L | 11 | -6 | 66 | -14 | 0.013 | 31 |
| Superior Frontal Gyrus (Medial) | R | 32 | 10 | 48 | 32 | 0.011 | 41 |
| Superior Frontal Gyrus (Medial) | L | 32 | -6 | 48 | 28 | 0.011 | 39 |
| ***Absent*** |  |  |  |  |  |  |  |
| Medial Orbital Frontal Gyrus | L | 11 | -6 | 42 | -10 | 0.026 | 88 |
| Middle Temporal Gyrus | R | 37 | 54 | -66 | 8 | 0.024 | 93 |
| Fusiform Gyrus | R | 20 | 44 | -44 | -18 | 0.021 | 62 |
| Angular Gyrus | L | 39 | -46 | -64 | 28 | 0.021 | 48 |
| Caudate | R |  | 6 | 10 | -6 | 0.020 | 70 |
| Middle Occipital Gyrus | L | 18 | -48 | -70 | 6 | 0.018 | 47 |
| Superior Parietal Lobule | L | 7 | -32 | -58 | 44 | 0.018 | 27 |
| Superior Frontal Gyrus (Medial) | R | 10 | 10 | 52 | 12 | 0.017 | 33 |
| Precuneus | R | 23 | 6 | -56 | 28 | 0.017 | 25 |
| Middle Temporal Gyrus | R | 21 | 56 | 4 | -20 | 0.016 | 27 |
| Inferior Frontal Gyrus (Orbital) | R | 47 | 40 | 18 | -8 | 0.016 | 29 |
| Amygdala | R |  | 24 | -2 | -20 | 0.015 | 28 |
| Superior Parietal Lobule | R | 7 | 26 | -54 | 66 | 0.015 | 20 |

**STable 11. Peak coordinates for micro-subgroup analysis: Risky decision-making sub-domain.**

| **Brain Regions** | **L/R** | **BA** | **MNI Coordinates** | | | **ALE** | **k** |
| --- | --- | --- | --- | --- | --- | --- | --- |
| **x** | **y** | **z** |
| ***Present*** |  |  |  |  |  |  |  |
| Superior Temporal Gyrus | R | 22 | 60 | -54 | 24 | 0.016 | 74 |
| Superior Frontal Gyrus (Medial) | R | 9 | 6 | 60 | 32 | 0.016 | 49 |
| Thalamus | R |  | 6 | -22 | -2 | 0.015 | 93 |
| Thalamus | L |  | -8 | -20 | -10 | 0.015 | 48 |
| Superior Frontal Gyrus (Medial) | R | 10 | 6 | 62 | 2 | 0.015 | 46 |
| Gyrus Rectus | R | 11 | 6 | 4 | -20 | 0.015 | 34 |
| Medial Orbital Frontal Gyrus | R | 11 | 6 | 38 | -6 | 0.015 | 34 |
| Lingual Gyrus | L | 18 | -24 | -94 | -20 | 0.015 | 28 |
| Inferior Occipital Gyrus | L | 19 | -38 | -84 | -20 | 0.014 | 32 |
| Precuneus | R | 7 | 6 | -60 | 56 | 0.011 | 26 |
| Superior Frontal Gyrus (Medial) | L | 32 | -8 | 46 | 28 | 0.011 | 23 |
| ***Absent*** |  |  |  |  |  |  |  |
| Middle Temporal Gyrus | R | 21 | 54 | -66 | 8 | 0.024 | 81 |
| Fusiform Gyrus | R | 20 | 44 | -44 | -18 | 0.021 | 59 |
| Angular Gyrus | L | 39 | -46 | -62 | 22 | 0.020 | 54 |
| Caudate | R |  | 6 | 8 | -6 | 0.018 | 23 |
| Superior Frontal Gyrus (Medial) | R | 10 | 10 | 52 | 12 | 0.018 | 40 |
| Inferior Frontal Gyrus (Orbital) | R | 47 | 38 | 24 | -16 | 0.018 | 75 |
| Middle Occipital Gyrus | L | 37 | -48 | -70 | 6 | 0.018 | 40 |
| Superior Parietal Lobule | L | 7 | -32 | -58 | 44 | 0.018 | 21 |
| Middle Temporal Gyrus | R | 21 | 56 | 4 | -20 | 0.016 | 22 |

**STable 12. Lateralization analyses for micro-domains.**

|  |  | **Total** | **VN** | **SMN** | **DAN** | **VAN** | **LN** | **FPN** | **DMN** | **VST** | **AMY** |
| --- | --- | --- | --- | --- | --- | --- | --- | --- | --- | --- | --- |
| ***Anthropomorphic Embodiment*** | | | |  |  |  |  |  |  |  |  |
| Present |  |  |  |  |  |  |  |  |  |  |  |
|  | L | 112 | 63 | 0 | 20 | 0 | 0 | 0 | 26 | 0 | 0 |
|  | R | 252 | 92 | 0 | 76 | 0 | 0 | 0 | 39 | 0 | 41 |
|  | LI | -0.38 | -0.19 | - | -0.58 | - | - | - | -0.2 | - | -1 |
| Absent |  |  |  |  |  |  |  |  |  |  |  |
|  | L | 164 | 22 | 0 | 0 | 18 | 0 | 4 | 88 | 0 | 0 |
|  | R | 493 | 0 | 0 | 0 | 0 | 0 | 17 | 305 | 1 | 0 |
|  | LI | -0.50 | 1 | - | - | - | - | - | -0.61 | - | - |
| ***Facial appearance*** | | |  |  |  |  |  |  |  |  |  |
| Present |  |  |  |  |  |  |  |  |  |  |  |
|  | L | 64 | 28 | 0 | 1 | 0 | 0 | 0 | 32 | 0 | 0 |
|  | R | 165 |  |  | 54 |  |  |  | 53 | 1 | 53 |
|  | LI | -0.44 | 1 | - | -0.96 | - | - | - | -0.25 | - | -1 |
| Absent |  |  |  |  |  |  |  |  |  |  |  |
|  | L | 92 | 0 | 0 | 0 | 0 | 0 | 0 | 66 | 0 | 0 |
|  | R | 428 | 0 | 0 | 0 | 0 | 0 | 19 | 322 | 1 | 0 |
|  | LI | -0.62 | - | - | - | - | - | - | -0.66 | - | - |
| ***Mentalization inferences*** | | |  |  |  |  |  |  |  |  |  |
| Present |  |  |  |  |  |  |  |  |  |  |  |
|  | L | 166 | 0 | 0 | 0 | 0 | 7 | 0 | 135 | 0 | 0 |
|  | R | 431 | 0 | 0 | 26 | 10 | 0 | 31 | 299 | 32 | 0 |
|  | LI | -0.44 | - | - | -1 | - | - | -1 | -0.38 | -1 | - |
| Absent |  |  |  |  |  |  |  |  |  |  |  |
|  | L | - | - | - | - | - | - | - | - | - | - |
|  | R | - | - | - | - | - | - | - | - | - | - |
|  | LI | - | - | - | - | - | - | - | - | - | - |
| ***Interaction goal*** |  |  |  |  |  |  |  |  |  |  |  |
| Present |  |  |  |  |  |  |  |  |  |  |  |
|  | L | 159 | 43 | 0 | 0 | 0 | 31 | 0 | 32 | 0 | 0 |
|  | R | 507 | 0 | 0 | 0 | 0 | 0 | 0 | 360 | 1 | 0 |
|  | LI | -0.52 | 1 | - | - | - | 1 | - | -0.84 | - | - |
| Absent |  |  |  |  |  |  |  |  |  |  |  |
|  | L | 210 | 32 | 0 | 20 | 0 | 6 | 22 | 130 | 0 | 0 |
|  | R | 387 | 86 | 0 | 89 | 9 | 2 | 16 | 89 | 49 | 27 |
|  | LI | -0.30 | -0.46 | - | -0.63 | - | - | 0.16 | 0.19 | -1 | -1 |
| ***Risky decision-making*** | | |  |  |  |  |  |  |  |  |  |
| Present |  |  |  |  |  |  |  |  |  |  |  |
|  | L | 131 | 47 | 0 | 0 | 0 | 0 | 0 | 16 | 0 | 1 |
|  | R | 357 | 0 | 0 | 24 | 0 | 0 | 2 | 184 | 2 | 0 |
|  | LI | -0.46 | 1 | - | -1 | - | - | - | -0.84 | - | - |
| Absent |  |  |  |  |  |  |  |  |  |  |  |
|  | L | 115 | 28 | 0 | 16 | 0 | 0 | 18 | 53 | 0 | 0 |
|  | R | 300 | 76 | 0 | 64 | 7 | 0 | 20 | 109 | 19 | 0 |
|  | LI | -0.45 | -0.46 | - | -0.6 | - | - | -0.05 | -0.35 | - | - |

**STable 13. Sensitivity Analysis Results for macro-domains. (Leave-One-Out).**

| **Brain Regions** | **L/R** | **BA** | **MNI Coordinates** | | | **k** |
| --- | --- | --- | --- | --- | --- | --- |
| **x** | **y** | **z** |
| ***Human > Artificial*** |  |  |  |  |  |  |
| Middle Temporal Gyrus | R | 39 | 56 | -62 | 18 | 369 |
| Middle Temporal Gyrus | L | 39 | -46 | -62 | 20 | 161 |
| ***Social perception*** |  |  |  |  |  |  |
| Middle Temporal Gyrus | R | 37 | 54 | -68 | 6 | 186 |
| Middle Occipital Gyrus | L | 37 | -50 | -70 | 0 | 95 |
| Middle Temporal Gyrus | L | 37 | -40 | -62 | 16 | 93 |
| ***Social interaction*** |  |  |  |  |  |  |
| Middle Temporal Gyrus | R | 39 | 54 | -62 | 24 | 248 |
| Medial Orbitofrontal Gyrus | L | 11 | -4 | 40 | -12 | 192 |

**STable 14. Sensitivity Analysis Results for micro-domains. (Leave-One-Out).**

| **Brain Regions** | **L/R** | **BA** | **MNI Coordinates** | | | **k** |
| --- | --- | --- | --- | --- | --- | --- |
| **x** | **y** | **z** |
| ***Anthropomorphic Embodiment : present*** | |  |  |  |  |  |
| Middle Temporal Gyrus | R | 37 | 54 | -68 | 6 | 224 |
| ***Anthropomorphic Embodiment : absent*** |  |  |  |  |  |  |
| Middle Temporal Gyrus | R | 39 | 54 | -62 | 24 | 148 |
| Anterior Cingulate Gyrus | R | 32 | 10 | 46 | 8 | 118 |
| Medial Orbitofrontal Gyrus | R | 11 | 6 | 38 | -10 | 92 |
| ***Facial appearance : present*** |  |  |  |  |  |  |
| Middle Temporal Gyrus | R | 21 | 56 | -54 | 16 | 129 |
| Middle Occipital Gyrus | L | 39 | -38 | -66 | 20 | 94 |
| ***Facial appearance : absent*** |  |  |  |  |  |  |
| Middle Temporal Gyrus | R | 39 | 54 | -66 | 24 | 127 |
| Anterior Cingulate Gyrus | R | 32 | 10 | 46 | 8 | 101 |
| ***Mentalization inference : present*** |  |  |  |  |  |  |
| Middle Temporal Gyrus | R | 21 | 56 | -58 | 22 | 300 |
| Rectus Gyrus | L | 11 | -6 | 42 | -14 | 170 |
| ***Interaction goal : present*** |  |  |  |  |  |  |
| Middle Temporal Gyrus | R | 22 | 58 | -52 | 20 | 282 |
| ***Interaction goal : absent*** |  |  |  |  |  |  |
| Middle Temporal Gyrus | R | 37 | 56 | -64 | 2 | 106 |
| Middle Temporal Gyrus | L | 39 | -40 | -64 | 18 | 103 |
| Rectus Gyrus | L | 11 | -4 | 40 | -14 | 92 |
| ***Risky decision-making : present*** |  |  |  |  |  |  |
| Middle Temporal Gyrus | R | 21 | 60 | -54 | 20 | 159 |
| Lingual Gyrus | R | 18 | 14 | -30 | -6 | 112 |
| ***Risky decision-making : absent*** |  |  |  |  |  |  |
| Middle Temporal Gyrus | L | 39 | -42 | -64 | 18 | 109 |
| Middle Temporal Gyrus | R | 37 | 56 | -68 | 4 | 101 |
| Inferior Frontal Gyrus (Orbital) | R | 47 | 38 | 22 | -18 | 95 |

**STable 15. Top 20 terms with category superscripts for each domain.**

| **Domain** | **Top 20 terms (*r*) with category superscripts** |
| --- | --- |
| Overall | social (0.27)ˢ; social interaction (0.23)ˢ; moral (0.22)ˢ; value (0.22)ʳ; social cognition (0.22)ˢ; theory of mind (0.21)ˢ; preference (0.20)ʳ; partner (0.20)ˢ; outcome (0.20)ʳ; reward (0.19)ʳ; intention (0.19)ˢ; money (0.19)ʳ; belief (0.19)ˢ; experience (0.18)ᵍ; affect (0.18)a; emotion (0.18)a; arousal (0.17)a; feeling (0.17)a; economic (0.17)ʳ; reinforcement (0.17)ʳ. |
| Macro-domain: Social perception | gesture (0.11)ᵍ; action observation (0.11)ᵍ; visual motion (0.11)ᵍ; perception (0.10)ᵍ; visual perception (0.09)ᵍ; direction (0.08)ᵍ; agent (0.07)ˢ; imitation (0.07)ᵍ; communication (0.06)ˢ; suffering (0.06)a; recognize (0.06)ᵍ; social cognition (0.06)ˢ; social (0.06)ˢ; social interaction (0.05)ˢ; face (0.05)ᵍ; intention (0.05)ˢ; interpersonal (0.05)ˢ; theory of mind (0.04)ˢ; empathy (0.04)a; facial (0.04)ᵍ. |
| Macro-domain: Social interaction | moral (0.11)ˢ; theory of mind (0.11)ˢ; preference (0.11)ʳ; reward (0.10)ʳ; economic (0.10)ʳ; outcome (0.10)ʳ; value (0.10)ʳ; social (0.09)ˢ; social interaction (0.09)ˢ; self referential (0.09)ˢ; belief (0.09)ˢ; partner (0.09)ˢ; money (0.09)ʳ; expectation (0.08)ʳ; decision making (0.08)ʳ; evaluation (0.08)ʳ; mental (0.08)ˢ; intention (0.07)ˢ; thought (0.07)ᵍ; understanding (0.07)ˢ. |
| **D1: Anthropomorphic embodiment (Present)** | gesture (0.09)ᵍ; responsive (0.08)ᵍ; action observation (0.08)ᵍ; social interaction (0.07)ˢ; social (0.07)ˢ; social cognition (0.07)ˢ; visual perception (0.07)ᵍ; recognize (0.06)ᵍ; face (0.06)ᵍ; agent (0.06)ˢ; communication (0.06)ˢ; intention (0.06)ˢ; anger (0.05)a; empathy (0.05)a; facial (0.05)ᵍ; threatening (0.05)a; perception (0.05)ᵍ; suffering (0.05)a; theory of mind (0.05)ˢ; interpersonal (0.05)ˢ. |
| **D1: Anthropomorphic embodiment (Absent)** | moral (0.10)ˢ; theory of mind (0.10)ˢ; belief (0.09)ˢ; self referential (0.08)ˢ; social (0.08)ˢ; understanding (0.08)ˢ; inference (0.08)ˢ; social interaction (0.07)ˢ; evaluation (0.07)ʳ; intention (0.07)ˢ; social cognition (0.07)ˢ; partner (0.07)ˢ; mental (0.06)ˢ; preference (0.06)ʳ; emotion (0.06)a; reasoning (0.06)ᵍ; thought (0.05)ᵍ; reward (0.05)ʳ; outcome (0.05)ʳ; economic (0.05)ʳ. |
| **D2: Facial appearance (Present)** | emotional valence (0.05)a; social cognition (0.05)ˢ; threatening (0.05)a; social (0.05)ˢ; social interaction (0.05)ˢ; emotion (0.05)a; anger (0.05)a; arousal (0.04)a; emotion regulation (0.04)a; happy (0.04)a; feeling (0.04)a; threat (0.04)a; unpleasant (0.04)a; face (0.04)ᵍ; intention (0.04)ˢ; angry (0.04)a; fearful (0.04)a; emotional faces (0.04)a; facial (0.04)ᵍ; theory of mind (0.04)ˢ. |
| **D2: Facial appearance (Absent)** | moral (0.10)ˢ; theory of mind (0.09)ˢ; social (0.08)ˢ; belief (0.08)ˢ; self referential (0.08)ˢ; mental (0.07)ˢ; understanding (0.07)ˢ; social interaction (0.07)ˢ; inference (0.07)ˢ; evaluation (0.07)ʳ; partner (0.07)ˢ; social cognition (0.06)ˢ; emotion (0.06)a; intention (0.06)ˢ; preference (0.06)ʳ; arousal (0.06)a; experience (0.06)ᵍ; outcome (0.06)ʳ; reward (0.06)ʳ; value (0.05)ʳ. |
| D3: Mentalization (Present) | theory of mind (0.11)ˢ; moral (0.11)ˢ; belief (0.09)ˢ; social (0.09)ˢ; intention (0.08)ˢ; social interaction (0.08)ˢ; economic (0.08)ʳ; preference (0.08)ʳ; self referential (0.08)ˢ; partner (0.08)ˢ; thought (0.08)ᵍ; outcome (0.08)ʳ; mental (0.08)ˢ; evaluation (0.07)ʳ; understanding (0.07)ˢ; expectation (0.07)ʳ; value (0.07)ʳ; reward (0.07)ʳ; experience (0.06)ᵍ; feeling (0.06)a. |
| **D4: Interaction goal (Present)** | moral (0.11)ˢ; belief (0.11)ˢ; intention (0.10)ˢ; theory of mind (0.10)ˢ; partner (0.08)ˢ; social interaction (0.08)ˢ; social (0.08)ˢ; mental (0.07)ˢ; evaluation (0.07)ʳ; violation (0.07)ᵍ; understanding (0.07)ˢ; thought (0.06)ᵍ; feeling (0.06)a; self referential (0.06)ˢ; social cognition (0.06)ˢ; preference (0.06)ʳ; expectation (0.06)ʳ; economic (0.05)ʳ; inference (0.05)ˢ; thinking (0.05)ᵍ. |
| **D4: Interaction goal (Absent)** | social (0.09)ˢ; social cognition (0.08)ˢ; social interaction (0.08)ˢ; money (0.07)ʳ; theory of mind (0.07)ˢ; agent (0.06)ˢ; arousal (0.05)a; emotion (0.05)a; preference (0.05)ʳ; anger (0.05)a; understanding (0.05)ˢ; intention (0.05)ˢ; value (0.05)ʳ; reward (0.05)ʳ; empathy (0.05)ˢ; feeling (0.05)a; moral (0.05)ˢ; partner (0.04)ˢ; affect (0.04)a; gesture (0.04)ᵍ. |
| D5:Risky decision-making (Present) | theory of mind (0.06)ˢ; moral (0.06)ˢ; mental (0.05)ˢ; partner (0.05)ˢ; intention (0.05)ˢ; social interaction (0.05)ˢ; belief (0.05)ˢ; social (0.05)ˢ; preference (0.05)ʳ; fear (0.04)a; reward (0.04)ʳ; evaluation (0.04)ʳ; social cognition (0.04)ˢ; emotion (0.04)a; violation (0.04)ᵍ; inference (0.04)ˢ; feeling (0.04)a; expectation (0.04)ʳ; pleasant (0.04)a; unpleasant (0.04)a. |
| D5:Risky decision-making (Absent) | social (0.07)ˢ; social interaction (0.07)ˢ; gesture (0.06)ᵍ; social cognition (0.06)ˢ; interpersonal (0.06)ˢ; suffering (0.05)a; recognize (0.05)ᵍ; action observation (0.05)ᵍ; intention (0.05)ˢ; empathy (0.05)a; anger (0.05)a; theory of mind (0.05)ˢ; perception (0.05)ᵍ; emotion (0.05)a; agent (0.04)ˢ; moral (0.04)ˢ; face (0.04)ᵍ; facial (0.04)ᵍ; partner (0.04)ˢ; belief (0.04)ˢ. |

**Note**: The superscripts represent the categories of the terms:S: Social-cognitive; R: Valuation; A: Affective/interoceptive; G: General processing.

**STable 16. Weighted term association strengths (Sum of Fisher's z) across domains and sub-domains.**

| ***Condition*** | ***Social-cognitive*** | ***Valuation*** | ***Affective/interoceptive*** | ***General processing*** |
| --- | --- | --- | --- | --- |
| Overall Distribution | 1.72 | 1.34 | 0.70 | 0.18 |
| ***Macro-domain*** | |  |  |  |
| Social perception | 0.44 | 0.00 | 0.10 | 0.82 |
| Social interaction | 0.89 | 0.81 | 0.00 | 0.07 |
| ***D1: Anthropomorphic embodiment*** | | |  |  |
| Present | 0.48 | 0.00 | 0.20 | 0.53 |
| Absent | 0.95 | 0.29 | 0.06 | 0.11 |
| ***D2: Facial appearance*** | | |  |  |
| Present | 0.23 | 0.00 | 0.58 | 0.08 |
| Absent | 0.90 | 0.29 | 0.12 | 0.06 |
| ***D3: Mentalization*** | | |  |  |
| Present | 0.89 | 0.52 | 0.06 | 0.15 |
| Absent | - | - | - | - |
| ***D4: Interaction goal*** | | |  |  |
| Present | 0.98 | 0.24 | 0.06 | 0.18 |
| Absent | 0.61 | 0.22 | 0.25 | 0.04 |
| ***D5: Risky decision-making*** | |  |  |  |
| Present | 0.52 | 0.17 | 0.19 | 0.04 |
| Absent | 0.51 | 0.00 | 0.19 | 0.29 |

**Note**: Each condition represents the top 20 meta-analytic terms extracted via Neurosynth. Values represent the weighted association strengths, computed as the sum of Fisher's *z*-values for the respective condition.

**STable 17. Descriptive Statistics for Micro-Subdomain Analyses (Artificial > Human contrast).**

| **Domain** | | **No. of Experiments** |
| --- | --- | --- |
| ***D1. Anthropomorphic Embodiment*** | | |
|  | Present | 5 |
|  | Absent | 22 |
| ***D2. Facial Appearance*** | |  |
|  | Present | 13 |
|  | Absent | 7 |
| ***D3. Mentalization*** | |  |
|  | Present | 10 |
|  | Absent | 10 |
| ***D4. Interaction Goal*** | |  |
|  | Present | 5 |
|  | Absent | 20 |
| ***D5. Risky Decision-Making*** | |  |
|  | Present | 4 |
|  | Absent | 16 |

**Supplementary Figures**


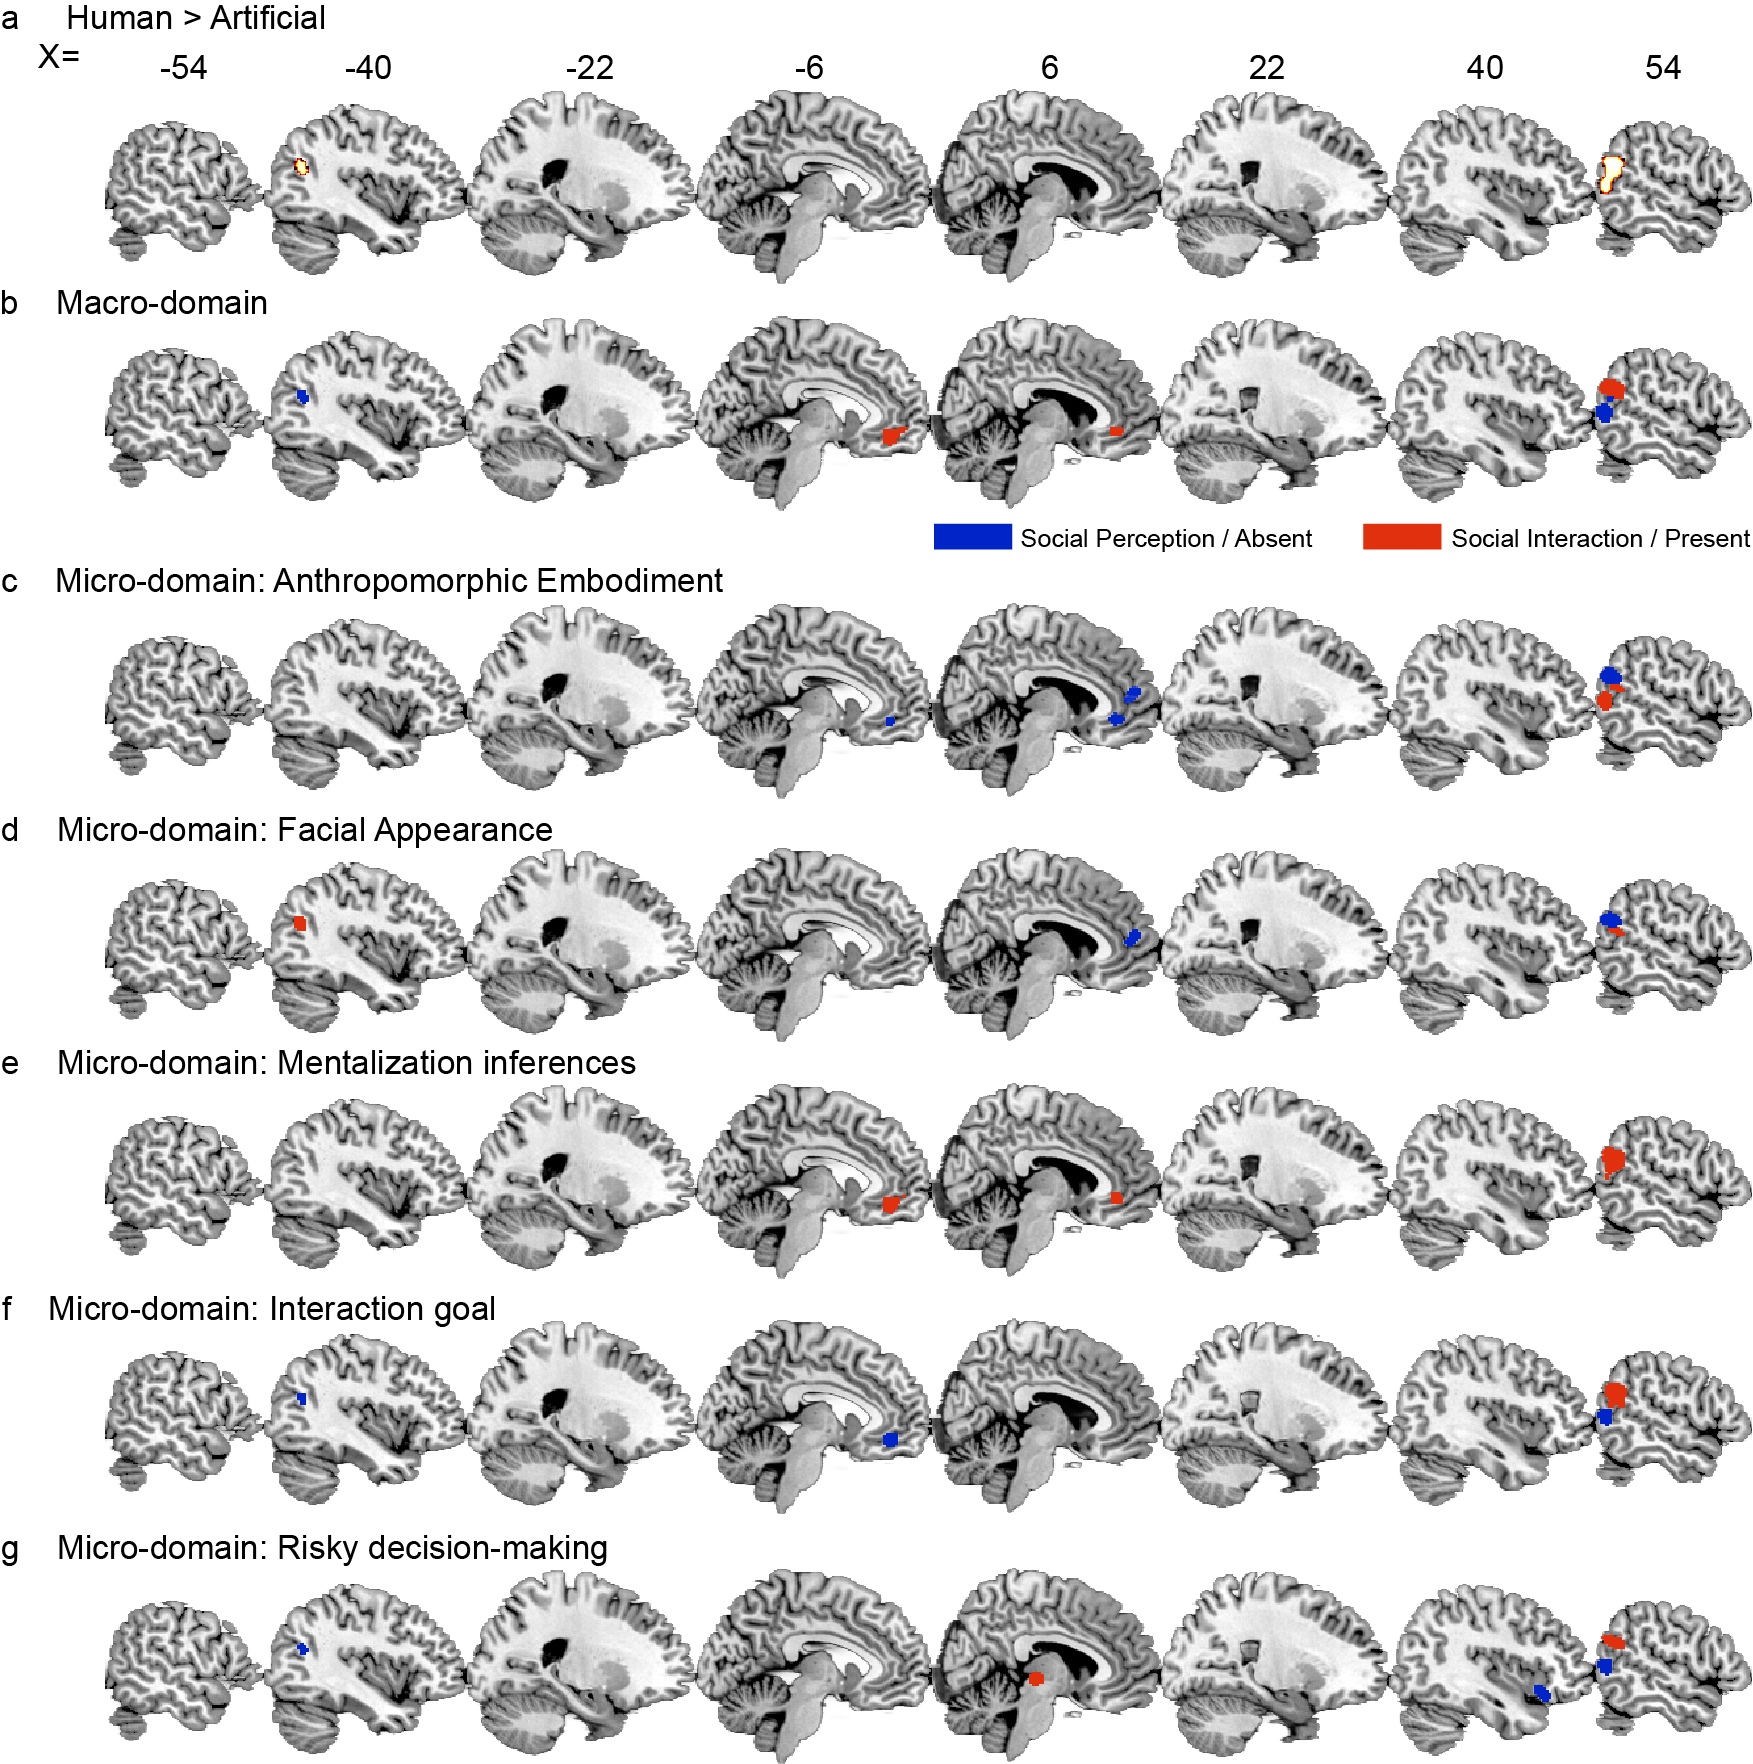


**SFigure 1.Robustness and sensitivity analyses via Leave-One-Out (LOO) procedures.** (a) The robust convergent activation map for the Overall Human > Artificial contrast, identifying core regions that remain significant across iterative study exclusions. (b) Stability of the Macro-domain modulation effect, illustrating the consistent neural segregation between Social Perception (blue) and Social Interaction (red). (c–g) LOO results for individual micro-domains, including Anthropomorphic Embodiment (c), Facial Appearance (d), Mentalization Inferences (e), Interaction Goal (f), and Risky Decision-making (g). Each row displays a series of sagittal slices (X = -54 to 54) demonstrating that the reported domain-specific recruitment patterns are not driven by any single study and exhibit high spatial stability across the brain.
